# Supplementary material for: Anti-Inflammatory and Anti-Apoptotic Effects of Stybenpropol A on Human Umbilical Vein Endothelial Cells
Source: MDPI journal article supplement (doi:10.3390/ijms20215383), 2019-10-29
Supplement: s1 [file s1]

# **Anti-inflammatory and Anti-apoptotic Effects of Stybenpropol A Isolated from Benzoinum on Human Umbilical Vein Endothelial Cells**

**Li Zhang<sup>1,†</sup>, Feifei Wang<sup>1,†</sup>, Qing Zhang<sup>1</sup>, Qiuming Liang<sup>1</sup>, Shumei Wang<sup>1,2</sup>, Minghua Xian<sup>\*1,2</sup>, and Feng Wang<sup>\*1,2</sup>**

<sup>1</sup> Key Laboratory of Digital Quality Evaluation of Chinese Materia Medica of State Administration of TCM, School of Traditional Chinese Medicine, Guangdong Pharmaceutical University, Guangzhou 510006, China

<sup>2</sup> Engineering & Technology Research Center for Chinese Materia Medica Quality of the Universities of Guangdong Province, School of Traditional Chinese Medicine, Guangdong Pharmaceutical University, Guangzhou 510006, China.

\* Correspondence: e-mail: wfeng1230@163.com; Fax: +86 020-39352174; Tel: +86 18676625933

† Authors contributed equally to this work.

## Contents of Supporting Information

| No. |                                                              | Page |
|-----|--------------------------------------------------------------|------|
| 1   | Extraction and isolation of <b>1</b>                         | 2    |
| 2   | Figure S1. <sup>1</sup> H NMR spectrum of <b>1</b> in MeOD.  | 3    |
| 3   | Figure S2. <sup>13</sup> C NMR spectrum of <b>1</b> in MeOD. | 3    |
| 4   | Figure S3. HSQC spectrum of <b>1</b> in MeOD.                | 4    |
| 5   | Figure S4. HMBC spectrum of <b>1</b> in MeOD.                | 4    |
| 6   | Figure S5. HRESIMS of <b>1</b> .                             | 5    |
| 7   | Figure S6. IR spectrum of <b>1</b> .                         | 6    |

### Extraction and isolation of **1**

Benzoinum (5 kg) was extracted by maceration in EtOH/H<sub>2</sub>O (95:5, 3 × 40 L) at room temperature, giving a crude extract (4.2 kg). The crude extract was suspended in water and extracted with petroleum ether and EtOAc, sequentially, and afforded an EtOAc-soluble extract (3.8 kg). The EtOAc-soluble fraction (2.0 kg) was subjected to a silica gel column using a petroleum ether/EtOAc gradient solvent system (50:1 to 0:100) to give seven fractions (B1–B7). Fraction B2 (598 g) was chromatographed over a silica gel column with petroleum ether/EtOAc mixtures (40:1 to 0:100) to yield fractions B2.1–B2.7. Fraction B2.2 (21.2 g) was fractionated into six parts (B2.2.1–B2.2.6) via MCI gel CHP 20P (MeOH/H<sub>2</sub>O, 30:70 to 100% MeOH). Fraction B2.2.4 (4.0 g) was separated by low and medium pressure ODS column eluted with MeOH/H<sub>2</sub>O followed by semi-preparative HPLC (MeOH/H<sub>2</sub>O, 80%) to yield **1** (6 mg).

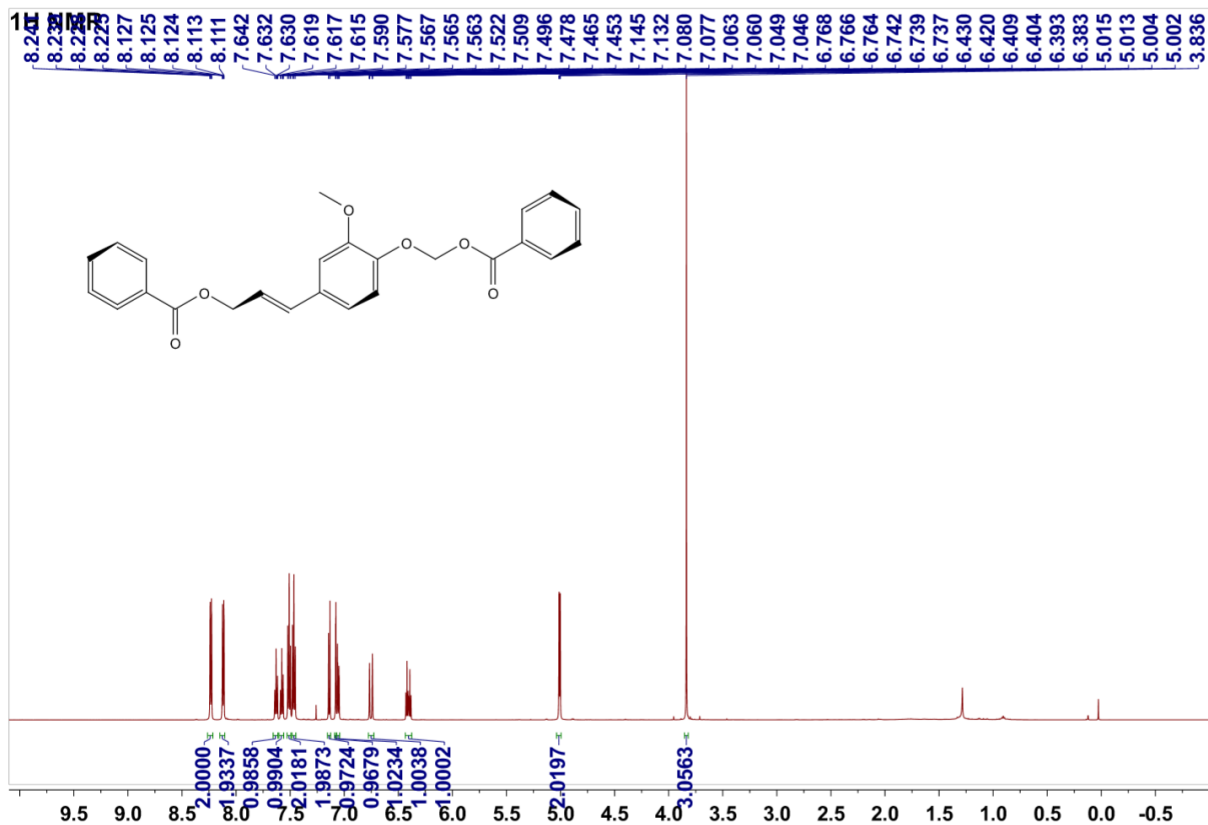

Figure S1. <sup>1</sup>H NMR spectrum of **1**

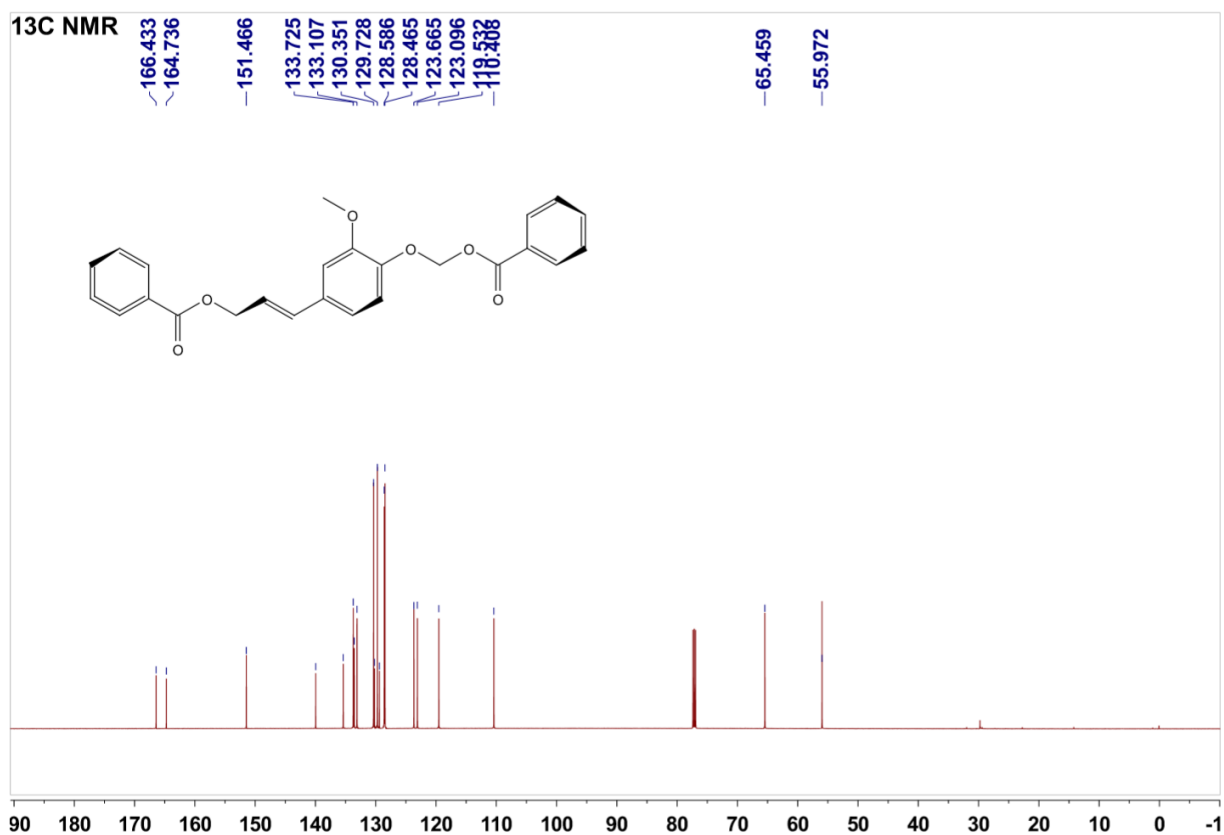

Figure S2. <sup>13</sup>C NMR spectrum of **1**

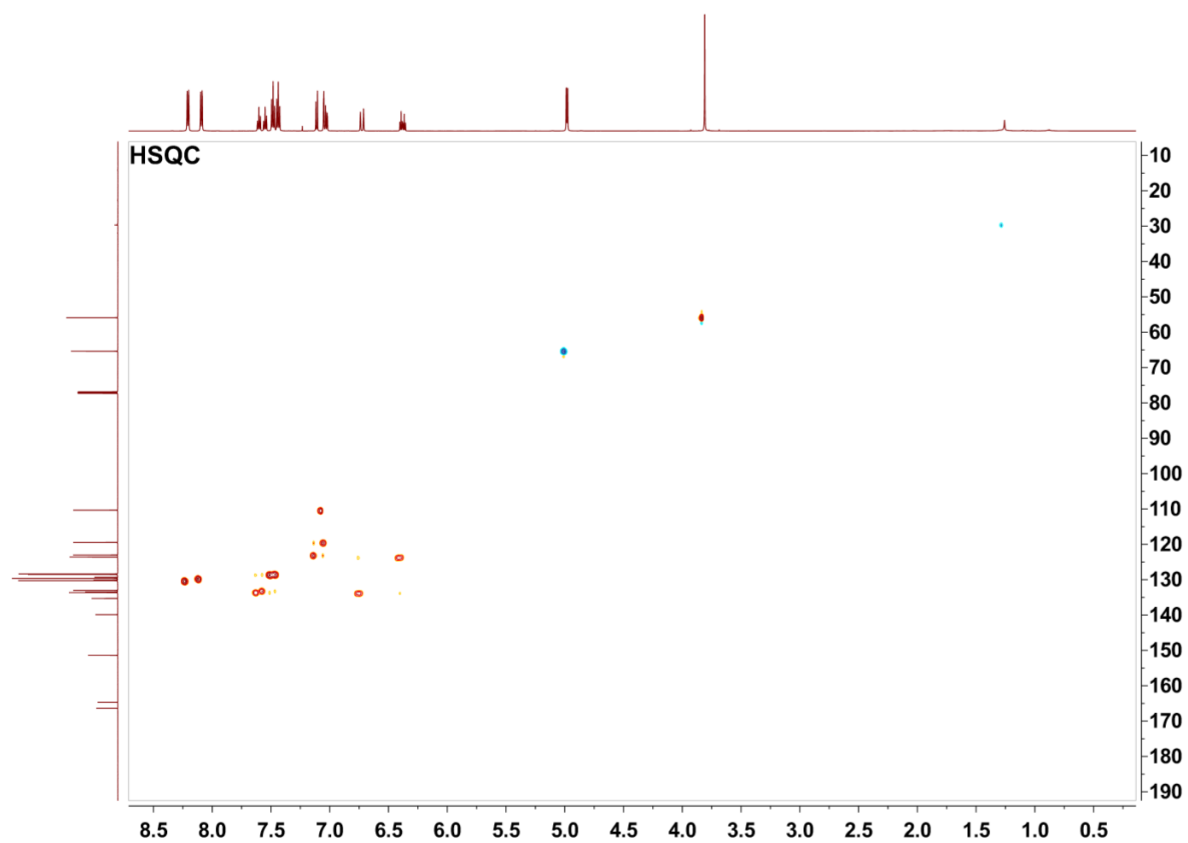

**Figure S3.** HSQC spectrum of **1** in MeOD.

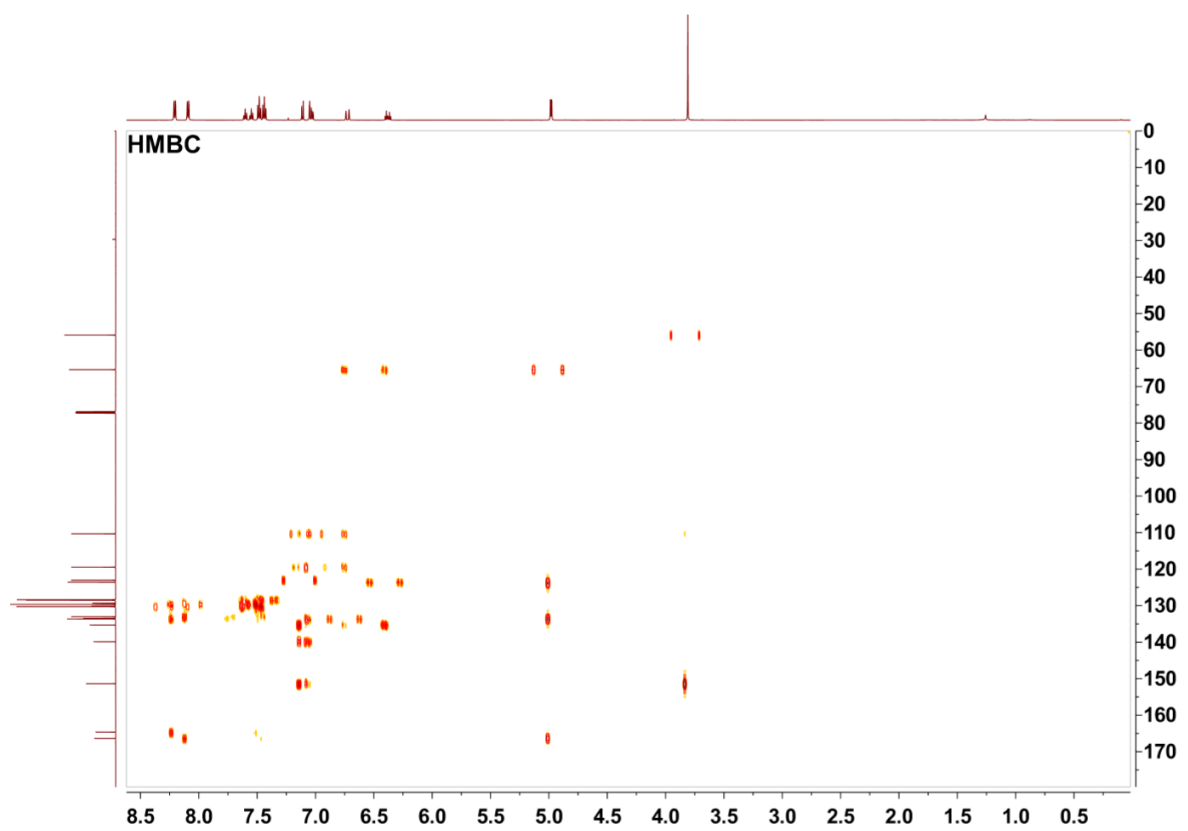

**Figure S4.** HMBC spectrum of **1** in MeOD.

## Mass Analysis Report

|                                             |                                  |                                       |                                                 |
|---------------------------------------------|----------------------------------|---------------------------------------|-------------------------------------------------|
| <b>Sample Name</b><br>S2-3-2-2              | <b>Operator</b><br>Q Exactive    | <b>Acquisition Date</b><br>11/22/2018 | <b>Method</b><br>C:\Xcalibur\methods\fs_sim_ESI |
| <b>Scan Mode</b><br>Full MS<br>Targeted-SIM | <b>Scan polarity</b><br>Negative | <b>Resolution</b><br>70000            | <b>Isolation window (m/z)</b><br>2              |

S232-2 #25 RT: 0.25 AV: 1 M<sup>+</sup>: 42058  
T: FTMS + p ESI Full ms [150.0]

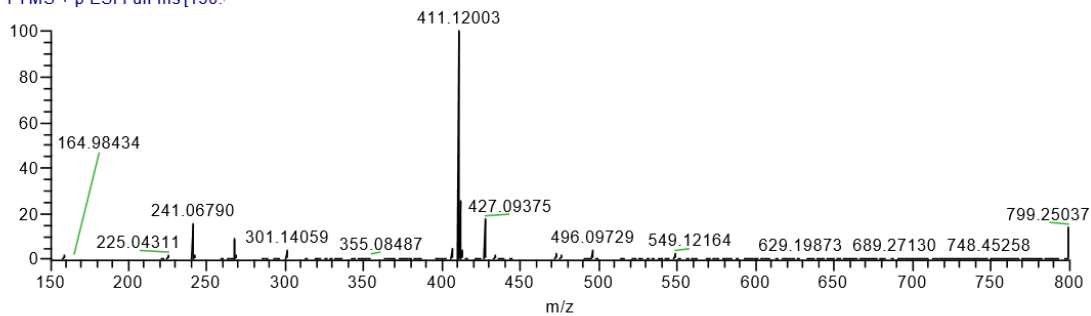

S232-2 #25 RT: 0.25 AV: 1 M<sup>+</sup>: 42058  
T: FTMS + p ESI Full ms [150.0]

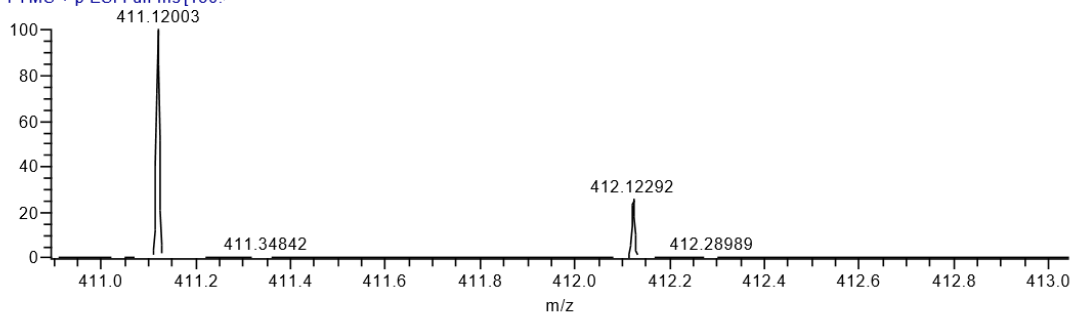

c24h20o5 +Na: C24 H20 O5 Na1 -- Chm 1

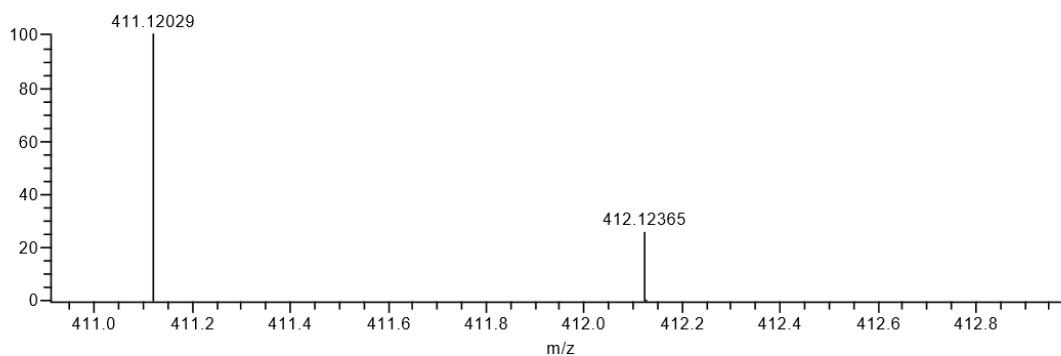

| Formula  | Species | Expected m/z | Measured m/z | Delta [ppm] |
|----------|---------|--------------|--------------|-------------|
| C24H20O5 | + Na    | 411.12029    | 411.12003    | -0.63       |

**Figure S5. HRESIMS of 1.**

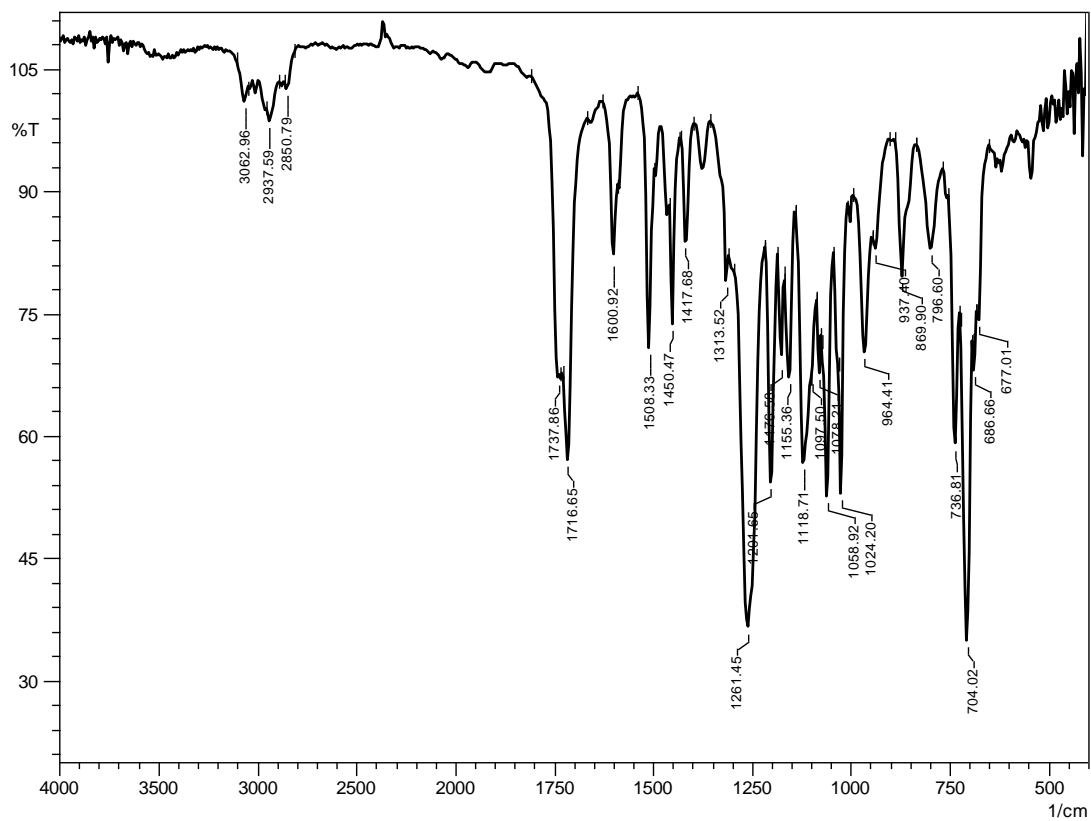

Figure S6. IR spectrum of **1**.
